# Supplementary material
Source: PubMed Central journal article supplement (PMC1091770)
Supplement: plntcell_tpc.104.030254_1.pdf [file plntcell_tpc.104.030254_1.pdf]

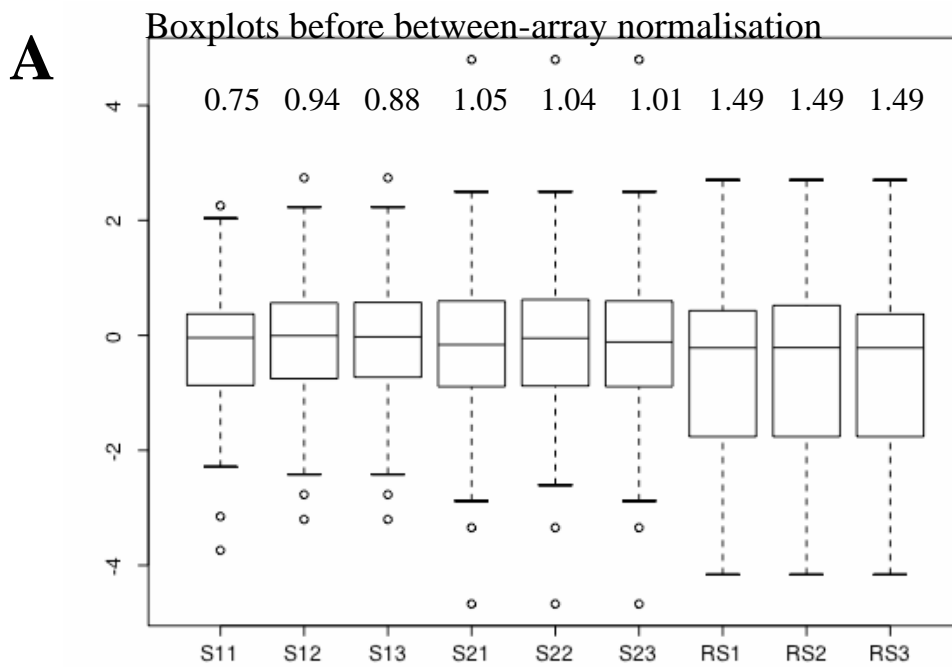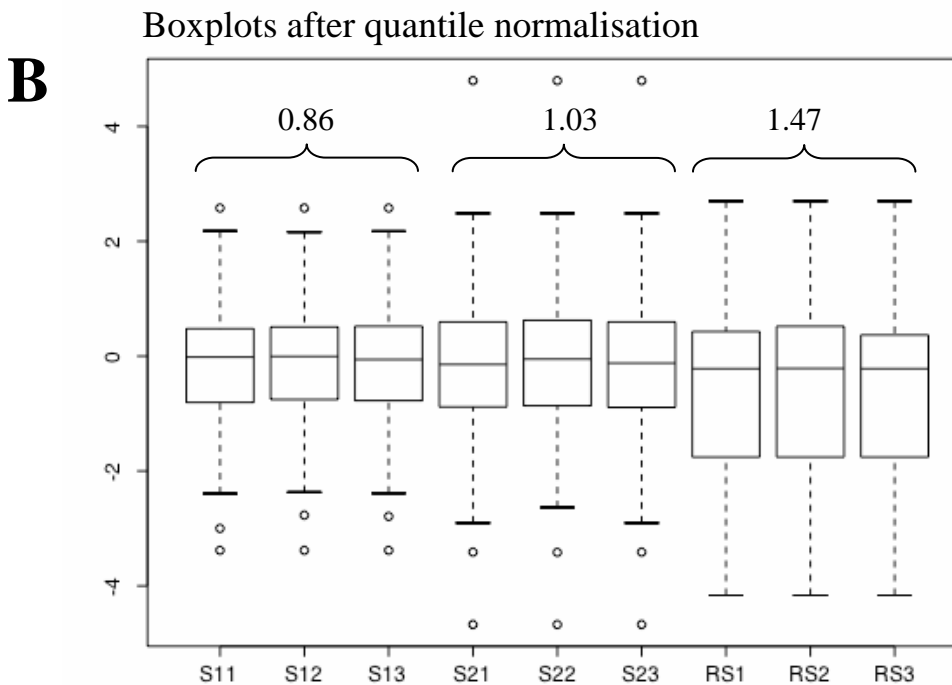

**Supplemental Figure 1** (Giegé *et al.*)

**Overall dispersion of gene expression in the individual microarray experiments.**

Boxplots for the individual microarray hybridisations S1 (1 to 3), S2 (1 to 3) and RS (1 to 3) before normalisation (**A**) and after quantile method normalisation (**B**). Log-ratio values are given on the y axis. The horizontal line in the middle of the boxes shows the log-ratio medians and the horizontal bars indicate the maximum and minimum log ratios.

The median absolute deviation (MAD) values are shown above the plots for the individual experiments in **A** and for the group of biological replicates in **B**.
