# Supplementary material
Source: PubMed Central journal article supplement (PMC1091770)
Supplement: plntcell_tpc.104.030254_2.pdf [file plntcell_tpc.104.030254_2.pdf]

## Supplemental Table 2.

### Primer sequences for mitochondrially-encoded genes used in the microarray experiment.

A are forward primers and B reverse primers.

*nad1* **A** ACGTACATAGCTGTTCCAGC  
**B** TAATTACTAGACCGACCCGC

*nad2* **A** GTAAGCTTCGGGCTTTCCTGAGG  
**B** ATTCTAGATTGTCCGGTCGTACC

*nad3* **A** CAGAATTCGAGAAAACAAAGTGGGC  
**B** TTGGATCCCCTATCACTTTACTCCC

*nad4* **A** GAGACAAAGAAAGATCAAGGC  
**B** AGCAATGATCTTCTTTAGATCG

*nad4L* **A** ATTATTTCTATTTTAGGTATTTCGG  
**B** TTCTACAGCAATAGTACCTCG

*nad5* **A** CATCCATAAGTAGCTTGGTCC  
**B** CGATGACCCTCTTTAGATCG

*nad6* **A** GGTTTGATGGTTGCACGTGC  
**B** CCTCCTCATTATAGTCCTCC

*nad7* **A** ACTCATGCTATGGATGTGGG  
**B** AACATTACACCACTGAATCCC

*nad9* **A** TGGAAAGATCGGAACATGGG  
**B** GGATCATCATAGCGTACTTGG

*cob* **A** ATTACAAGCTTAGCTAGCGC  
**B** GCTTTGTCAGGTATACTACG

*cox1* **A** TTCATTCTGGTTGTTGCCAC  
**B** CGAAGAACCAAAAGAGATGC

*cox2* **A** CAATTAGGATCTCAAGACGC  
**B** TGTCAAAAGTGAGTGACTION

*cox3* **A** ATACCATGTTTCGTATGGTGG  
**B** AAACCATGAAAGCCTGTTGC

*atp1* **A** CTTGAGAATGAGAATGTCCG  
**B** TTAATTGTCCCACAGTCGAG

*atp6* **A** ACATCTTCTGCTTCCACC  
**B** TCATCAGCAATGGACTGC

*atp8* **A** ATGGAGATGGAGTACTTGGG  
**B** AATTCCTACAAGTGATCCACC

*atp9* **A** CAACCCGAGATGTTAGAAGG  
**B** TTGCTTTATGAGACTGAATGG

*ccmFN2* **A** CTCGTATATCGTCGTAACGC  
**B** TGGATTTTGCGAGCTGTTCC

*ccmB* **A** TCAAAGACCAGAAGCTACGC  
**B** CAAGATACGGGTTGAGAAGG

*ccmC* **A** TTTATGGTCGTGCCTTGTGG  
**B** TTTCGTCGTTGCTCATTCCC

*ccmFN1* **A** ACAAGAAACAACCACCAGCG  
**B** TCCTTTCAGGATAAAGCGGC  
*ccmFC* **A** CGAAGCTTAAGACCCTTTCTTCGACG  
**B** GAGAATTCAGCCCAGCAAGAAGTTC

*rpl2* **A** ATCTGAAACGAAGCACTTCC  
**B** CTCACTTTCTGTCTCATTCG  
*rpl5* **A** TCATTACGAAGATGTATCACG  
**B** AGTCTCATCTTGTGTGTTGG  
*rpl16* **A** CGGAATTCAGTAAATATCGTAAAGGC  
**B** TAGGATCCTACGTTACGACCACTG

*rps3* **A** AGGAATTCTTGGTGAATGGAAGCCC  
**B** TAGGATCCATATTTTCGTACGTTTCGG  
*rps4* **A** CGGAATTCAGGGACGCAATGTGGC  
**B** GTAAGCTTGAGTGACTACGCCGATC  
*rps7* **A** ATGAATTCGAAATTTTCAGCTATATGG  
**B** CTTCTAGAGTGGTCTCACTTTACC  
*rps12* **A** AAGGATCCGAAAGAGAATAATGCC  
**B** TCAAGCTTCATCTTCCATTCATATCG

*orfX* **A** CGTTCGGATATTGATCGG  
**B** ACCGATGGAATGAACG  
*orf25* **A** TGAGTATTACGAATATGGATGG  
**B** ATGCGACGGGAAGAAGTGG  
*matR* **A** TAAGAGCATGCAACGCAAAGC  
**B** TGTAGGAAATGGGCGATACG  
*Ψsdh4* **A** ATGAAGGAACGAAAGAGTGGATTAC  
**B** GAATTCGGTCATTTCTTGGTGAACATGATC

*orf294* **A** TGAATGACGCTATTGTTGC  
**B** GGATGTGTAAGTTGCGGAGG  
*orf291* **A** TCGTCGGAGGATTCTTTTGG  
**B** GTCTGAGAAGGTCACGCTC  
*orf262* **A** TTACTGTCTTTATGGG  
**B** GAGAATTCCAGCACGGTATG  
*orf240a* **A** ATTTTGTTTGGGGGCTGAGG  
**B** AGATACGAAAATGGCGCTGG

*rrn26* **A** TTTTCAAGTGTCAGTAGCGG  
**B** TTGACTATGACAAGAGTCGC  
*rrn18* **A** ACGAATTCCTACCACTGCAGGGC  
**B** GAGGATCCAAGTCCATCGCGAAGG  
*rrn5* **A** TCGAATTCGTTTCATCAATCGGAAATC  
**B** AAGGATCCATTTTATTTCTTCACCGG

**EST clones representing nuclear-encoded genes used in the microarray experiment.**

| <b>Transcript</b>                       | <b>EST accession</b> |
|-----------------------------------------|----------------------|
| B14 SU                                  | 98F13T7              |
| 40 kDa SU                               | 105E19T7             |
| 76 kDa Fe-S SU                          | 110C18T7             |
| PSST SU                                 | 116H21T7             |
| sdh2 Fe-S                               | 97G5T7               |
| cyt c1                                  | 123I17T7             |
| 11 kDa SU                               | 83H9T7               |
| 14 kDa SU                               | 157P5T7              |
| MPP a SU                                | 91H16T7              |
| MPP b SU                                | 113G19T7             |
| cox Vc                                  | 245H11T7             |
| cox Vib                                 | 147A24T7             |
| cox Vb                                  | 235H7T7              |
| atpase b                                | 107I9T7              |
| atpase b                                | 93E4T7               |
| atpase d'                               | 110H13T7             |
| atpase g                                | 217D21T7             |
| atpase 6kDa SU                          | 240K2T7              |
| rps24                                   | E7B6T7               |
| rps14                                   | 144N3T7              |
| <br>                                    |                      |
| RNA pol III 160 kDa                     | 94D1T7               |
| Chloro RNA pol                          | 175A4T7              |
| RNA pol II 13.3 kDa SU                  | E5F10T7              |
| RNA pol II elongation factor            | E2C2T7               |
| transcription factor tga1               | 91C23T7              |
| transcription factor SF3                | 111C13T7             |
| transcription factor BTF3               | 151L19T7             |
| heat shock transcription factor (HSTF8) | 167D24T7             |
| Mito RNA pol                            | custom primers       |
| Glu tRNA synthetase                     | 108C4T7              |
| Arg tRNA synthetase                     | 144G13T7             |
| Gly tRNA synthetase                     | 117F7T7              |
| Mito elongation factor G                | 114P12T7             |
| elongation factor eEF-1                 | 161F17T7             |
| elongation factor Tu                    | 205P2T7              |
| citrate synthase                        | 123C9T7              |
| aconitase                               | 131K21T7             |
| aldolase c1                             | E11C12T7             |
| enolase                                 | 206G21T7             |
| hexokinase 1                            | 201B5T7              |
| mito malate dehydrogenase               | 85A11T7              |
| cyto malate dehydrogenase               | F4H12T7              |
| phospholipase D                         | 114E18T7             |

|                                           |          |
|-------------------------------------------|----------|
| phosphoinositide-spec phospholipase C     | 106H3T7  |
| acyl-desaturase                           | 160P15T7 |
| acetyl-coA carboxylase                    | 156K18T7 |
| glutamate dehydrogenase                   | 134D5T7  |
| aspartate aminotransferase Asp2           | 91N10T7  |
| pyruvate dehydrogenase E1, b SU mito      | 143E5T7  |
| pyruvate dehydrogenase E1, a SU mito      | 216N14T7 |
| NADP-dep malic enzyme                     | 137K24T7 |
| cytosol pyruvate kinase                   | 110J2T7  |
| plastid pyruvate kinase                   | 64A6T7   |
| ADP-glucose pyrophosphorylase             | 213J5T7  |
| atpase d                                  | 71D2T7   |
| atpase e                                  | E2D1T7   |
| rubisco (M86720)                          | 91I8T7   |
| rubisco b SU                              | 121J16T7 |
| glutathione S-transferase ERD11           | 90L23T7  |
| glutathione S-transferase PM24            | 110B6T7  |
| glutathione peroxidase, cytosolic         | 88H14T7  |
| glutathione peroxidase, chloroplast       | 221J22T7 |
| L ascorbate peroxidase, cytosolic         | 141O18T7 |
| L ascorbate peroxidase, chloroplast       | 246B12T7 |
| aldose reductase, AR (aldehyde reductase) | 215C1T7  |
| Mn superoxide dismutase                   | 123N9T7  |
| LON protease (Ser prot, ATP dep)          | 171P22T7 |
| subtilisin like protease (Ser)            | 91I22T7  |
| Cys protease (drought inducible)          | 228K16T7 |
| 26S protease AAA ATPase SU (RPT3)         | 191I3T7  |
| CLPP like protease (nClpP2)               | 98H22T7  |
| thiol (Cys) protease rd21A                | 113J22T7 |
| ATP dep CLP protease (ClpP1)              | 153H24T7 |
